# Supplementary material
Source: Springer Nature journal article supplement (https://www.springermedizin.de/resource/supplementary/13063_2014_2328_MOESM5_ESM.pdf/9621924)

Average number of citations per year

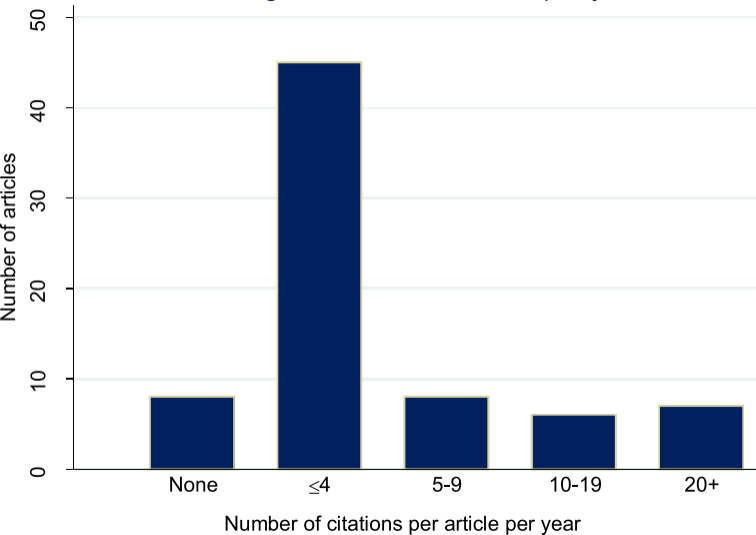

Supplement: MOESM5 [file 9621924]
